# Supplementary material for: Facile Synthesis Hyper-Crosslinked PdFe Bimetallic Polymer as Highly Active Catalyst for Ullmann Coupling Reaction of Chlorobenzene
Source: MDPI journal article supplement (doi:10.3390/polym15122748), 2023-06-20
Supplement: s1 [file s1]

## Supporting Information

# Facile Synthesis Hyper-Crosslinked PdFe Bimetallic Polymer as Highly Active Catalyst for Ullmann Coupling Reaction of Chlorobenzene

Cheng Tang <sup>1,2,†</sup>, Wenwen Yang <sup>1,†</sup>, Zhijuan Zou <sup>1,\*</sup>, Fang Liao <sup>1</sup>, Chunmei Zeng <sup>1</sup> and Kunpeng Song <sup>1,\*</sup>

<sup>1</sup> Chemical Synthesis and Pollution Control Key Laboratory of Sichuan Province,  
College of Chemistry and Chemical Engineering, China West Normal University, Shida Road,  
Nanchong 637009, China; 20200043@sasu.edu.cn (C.T.);  
wenwenyang85@163.com (W.Y.); liaofang407@163.com (F.L.);  
meizeng@163.com (C.Z.)

<sup>2</sup> Key Laboratory of Low-cost Rural Environmental Treatment Technology,  
Sichuan University of Arts and Science, Education Department of Sichuan Province, Dazhou 635000, China

\* Correspondence: zouzhijuan121@163.com (Z.Z.); song19880405@126.com (K.S.)

† The authors contributed equally to this paper.

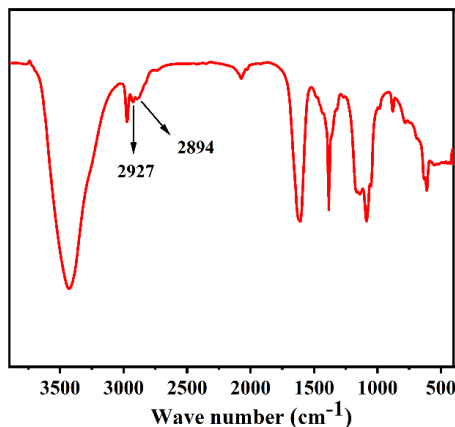

**Figure S1.** The FT-IR spectrum of catalyst HCP@Pd/Fe.

**Table S1** HCP@Pd/Fe catalyzed Ullmann coupling reaction of different aryl halides.

| Entry | Substrate1                                                                          | Base                                              | Solvent<br>(2ml)                         | T(°C) | Yield<br>(%) |
|-------|-------------------------------------------------------------------------------------|---------------------------------------------------|------------------------------------------|-------|--------------|
| 1     | 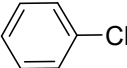   | K <sub>3</sub> PO <sub>4</sub> ·3H <sub>2</sub> O | CH <sub>3</sub> OH: H <sub>2</sub> O=1:1 | 80    | 91           |
| 2     |    | K <sub>3</sub> PO <sub>4</sub> ·3H <sub>2</sub> O | CH <sub>3</sub> OH: H <sub>2</sub> O=1:1 | 90    | 97.7         |
| 3     |    | K <sub>3</sub> PO <sub>4</sub> ·3H <sub>2</sub> O | CH <sub>3</sub> OH: H <sub>2</sub> O=1:1 | 100   | 100          |
| 4     |    | K <sub>3</sub> PO <sub>4</sub> ·3H <sub>2</sub> O | CH <sub>3</sub> OH: H <sub>2</sub> O=1:1 | 100   | 99.1         |
| 5     |    | K <sub>3</sub> PO <sub>4</sub> ·3H <sub>2</sub> O | CH <sub>3</sub> OH: H <sub>2</sub> O=1:1 | 80    | 96.3         |
| 6     |  | K <sub>3</sub> PO <sub>4</sub> ·3H <sub>2</sub> O | CH <sub>3</sub> OH: H <sub>2</sub> O=1:1 | 80    | 60           |

Reaction conditions: aryl halide (1 mmol), K<sub>3</sub>PO<sub>4</sub>·3H<sub>2</sub>O (1.5 mmol), V<sub>MeOH</sub>/V<sub>H<sub>2</sub>O</sub>=1:1 (2 ml), catalyst (20 mg), reaction time 180 min.
